# Supplementary material for: Associations between CYP1A1 rs1048943 A > G and rs4646903 T > C genetic variations and colorectal cancer risk: Proof from 26 case-control studies
Source: PubMed Central journal article supplement (PMC5239481; doi:10.18632/oncotarget.10331), 2016-06-30
Supplement: oncotarget-07-51365-s001.pdf [file oncotarget-07-51365-s001.pdf]

# Associations between *CYP1A1* rs1048943 A>G and rs4646903 T>C genetic variations and colorectal cancer risk: Proof from 26 case-control studies

## Supplementary Materials

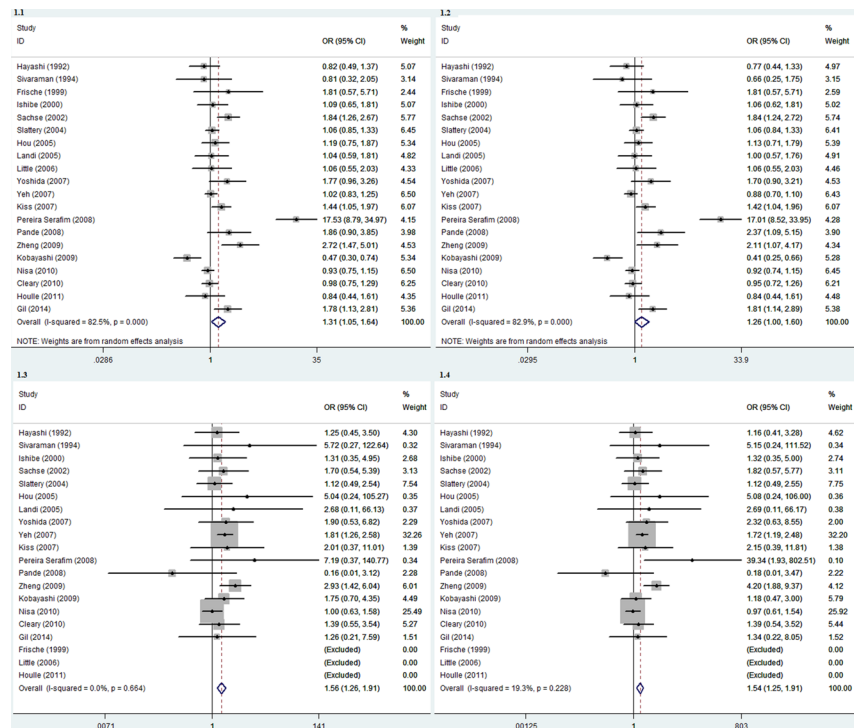

**Supplementary Figure S1: Forest plots of colorectal cancer risk associated with *CYP1A1* rs1048943 A > G polymorphism.** All models showed statistical significance between *CYP1A1* rs1048943 A > G and colorectal cancer risk and the specific values were as follows. **1.1** Dominant model (GG/GA vs. AA), OR = 1.31, 95% CI = 1.05–1.64; **1.2** Heterozygote model (GA vs. AA), OR = 1.26, 95% CI = 1.00–1.60; **1.3** Recessive model (GG vs. GA/AA), OR = 1.56, 95% CI = 1.26–1.91; **1.4** Homozygote model (GG vs. AA), OR = 1.54, 95% CI = 1.25–1.91.

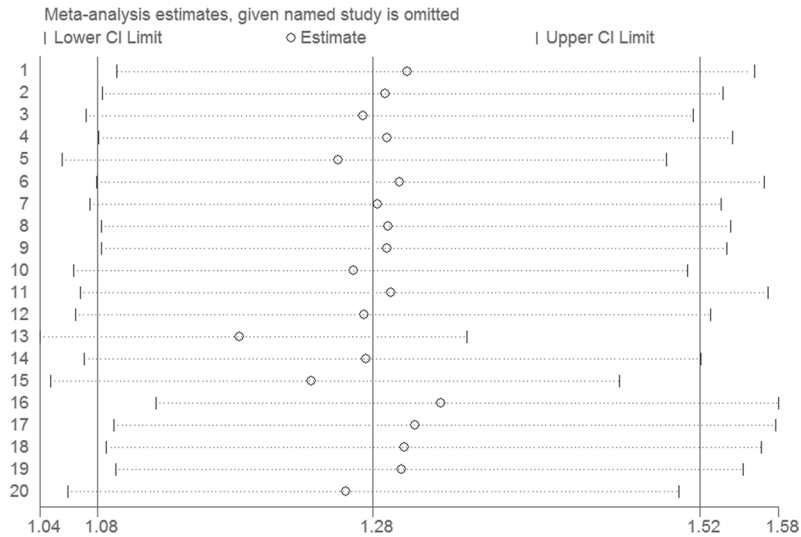

**Supplementary Figure S2: The leave-one-out sensitivity analysis of colorectal cancer risk associated with CYP1A1 rs1048943 A > G polymorphism (G vs. A).**

**Supplementary Table S1: Scale for quality assessment criterion**

| Criterion                                                 | Score |
|-----------------------------------------------------------|-------|
| Source of cases                                           | 3     |
| Selected from population or cancer registry               | 2     |
| Selected from hospital                                    | 1     |
| Selected from pathology archives, but without description | 0     |
| Not described                                             | 0     |
| Source of controls                                        | 3     |
| Population –based                                         | 2     |
| Blood donors or volunteers                                | 1     |
| Hospital-based (cancer free patients)                     | 0     |
| Not described                                             | 0     |
| Specimens used for determining genotypes                  | 3     |
| White blood cells or normal tissues                       | 0     |
| Tumor tissues or exfoliated cells of tissue               | 0     |
| Hardy-Weinberg equilibrium in controls                    | 3     |
| Hardy- Weinberg equilibrium                               | 0     |
| Hardy- Weinberg disequilibrium                            | 0     |
| Total sample size                                         | 3     |
| > 1000                                                    | 2     |
| > 500 and ≤ 1000                                          | 1     |
| > 200 and ≤ 500                                           | 0     |
| ≤ 200                                                     | 0     |

**Supplementary Table S2: The process of scoring on included studies**

| Study          | Polymorphism type | Source of cases (score) | Source of Controls (score) | Specimens used for determining genotype (score) | HWE in control (score) | Total sample size (score) | score |
|----------------|-------------------|-------------------------|----------------------------|-------------------------------------------------|------------------------|---------------------------|-------|
| Hayashi,1992   | rs1048943         | 2                       | 3                          | 3                                               | 3                      | 1                         | 12    |
| Sivaraman,1994 | rs1048943         | 2                       | 3                          | 3                                               | 3                      | 0                         | 11    |
|                | rs4646903         | 2                       | 3                          | 3                                               | 3                      | 0                         | 11    |
| Frische,1999   | rs1048943         | 3                       | 3                          | 3                                               | 3                      | 1                         | 13    |
|                | rs4646903         | 3                       | 3                          | 3                                               | 3                      | 1                         | 13    |
| Ishibe,2000    | rs1048943         | 3                       | 3                          | 3                                               | 3                      | 1                         | 13    |
|                | rs4646903         | 3                       | 3                          | 3                                               | 3                      | 1                         | 13    |
| Sachse,2002    | rs1048943         | 2                       | 3                          | 3                                               | 0                      | 3                         | 11    |
|                | rs4646903         | 2                       | 3                          | 3                                               | 3                      | 3                         | 14    |
| Ye,2002        | rs4646903         | 2                       | 3                          | 3                                               | 3                      | 0                         | 11    |
| Slattery,2004  | rs1048943         | 3                       | 3                          | 3                                               | 0                      | 3                         | 12    |
|                | rs4646903         | 3                       | 3                          | 3                                               | 3                      | 3                         | 15    |
| Hou,2005       | rs1048943         | 2                       | 1                          | 3                                               | 3                      | 3                         | 12    |
| Landi,2005     | rs1048943         | 2                       | 1                          | 3                                               | 3                      | 2                         | 11    |
|                | rs4646903         | 2                       | 1                          | 3                                               | 3                      | 2                         | 11    |
| Chen,2005      | rs4646903         | 3                       | 3                          | 3                                               | 3                      | 1                         | 13    |
| Little,2006    | rs1048943         | 3                       | 3                          | 3                                               | 3                      | 2                         | 14    |
|                | rs4646903         | 3                       | 3                          | 3                                               | 3                      | 2                         | 14    |
| Bente,2006     | rs4646903         | 2                       | 1                          | 3                                               | 3                      | 3                         | 10    |
| Youshida,2007  | rs1048943         | 2                       | 3                          | 3                                               | 3                      | 0                         | 11    |
|                | rs4646903         | 2                       | 3                          | 3                                               | 3                      | 0                         | 11    |
| Yeh,2007       | rs1048943         | 2                       | 1                          | 3                                               | 3                      | 3                         | 12    |
| Kiss,2007      | rs1048943         | 2                       | 1                          | 3                                               | 3                      | 3                         | 12    |
| Pereira, 2008  | rs1048943         | 2                       | 3                          | 3                                               | 3                      | 1                         | 12    |
| Pande,2008     | rs1048943         | 3                       | 3                          | 3                                               | 0                      | 1                         | 10    |
|                | rs4646903         | 3                       | 3                          | 3                                               | 3                      | 1                         | 13    |
| Zheng,2009     | rs1048943         | 2                       | 3                          | 3                                               | 0                      | 0                         | 8     |
|                | rs4646903         | 2                       | 3                          | 3                                               | 3                      | 0                         | 11    |
| Liu,2009       | rs4646903         | 2                       | 1                          | 3                                               | 0                      | 0                         | 6     |
| Kobayashi,2009 | rs1048943         | 2                       | 1                          | 3                                               | 0                      | 1                         | 7     |
| Nisa,2010      | rs1048943         | 2                       | 3                          | 3                                               | 3                      | 3                         | 14    |
|                | rs4646903         | 2                       | 3                          | 3                                               | 3                      | 3                         | 14    |
| Cleary,2010    | rs1048943         | 2                       | 3                          | 3                                               | 0                      | 3                         | 11    |
|                | rs4646903         | 2                       | 3                          | 3                                               | 3                      | 3                         | 14    |
| Houille,2011   | rs1048943         | 2                       | 1                          | 3                                               | 3                      | 2                         | 11    |
|                | rs4646903         | 2                       | 1                          | 3                                               | 3                      | 2                         | 11    |
| Darazy,2011    | rs4646903         | 2                       | 3                          | 0                                               | 0                      | 0                         | 5     |
| Saeed,2013     | rs4646903         | 3                       | 1                          | 3                                               | 3                      | 0                         | 10    |
| Gil,2014       | rs1048943         | 2                       | 1                          | 3                                               | 3                      | 2                         | 11    |

HWE, Hardy-Weinberg equilibrium.

**Supplementary Table 3: The genotype distribution of included studies**

**Supplementary Table 3.1: The genotype distribution of rs1048943 A > G polymorphism of included studies**

| Study          | case        |              |             | Control    |                |              |             |            |
|----------------|-------------|--------------|-------------|------------|----------------|--------------|-------------|------------|
|                | Case sample | AA (n/%)     | GA (n/%)    | GG (n/%)   | Control sample | AA (n/%)     | GA (n/%)    | GG (n/%)   |
| Hayashi,1992   | 85          | 59 (69.41)   | 21 (24.71)  | 5 (5.88)   | 358            | 233 (65.08)  | 108 (30.17) | 17 (4.75)  |
| Sivaraman,1994 | 43          | 32 (74.42)   | 9 (20.93)   | 2 (4.65)   | 47             | 33 (70.21)   | 14 (29.79)  | 0 (0.00)   |
| Frische,1999   | 187         | 174 (93.05)  | 13 (6.95)   | 0 (0.00)   | 101            | 97 (96.04)   | 4 (3.96)    | 0 (0.00)   |
| Ishibe,2000    | 212         | 176 (83.02)  | 31 (14.62)  | 5 (2.36)   | 221            | 186 (84.16)  | 31 (14.03)  | 4 (1.81)   |
| Sachse,2002    | 490         | 415 (84.69)  | 68 (13.88)  | 7 (1.43)   | 592            | 539 (91.05)  | 48 (8.11)   | 5 (0.84)   |
| Slattery,2004  | 1791        | 1632 (91.12) | 148 (8.26)  | 11 (0.61)  | 2180           | 1997 (91.61) | 171 (7.84)  | 12 (0.55)  |
| Hou,2005       | 675         | 633 (93.78)  | 40 (5.93)   | 2 (0.30)   | 679            | 643 (94.70)  | 36 (5.30)   | 0 (0.00)   |
| Landi,2005     | 362         | 333 (91.99)  | 28 (7.73)   | 1 (0.28)   | 323            | 298 (92.26)  | 25 (7.74)   | 0 (0.00)   |
| Little,2006    | 251         | 235 (93.63)  | 16 (6.37)   | 0 (0.00)   | 396            | 372 (93.94)  | 24 (6.06)   | 0 (0.00)   |
| Youshida,2007  | 66          | 34 (51.52)   | 27 (40.91)  | 5 (7.58)   | 212            | 79 (65.29)   | 37 (30.58)  | 5 (4.13)   |
| Yeh,2007       | 717         | 400 (55.79)  | 228 (31.80) | 89 (12.41) | 729            | 410 (56.24)  | 266 (36.49) | 53 (7.27)  |
| Kiss,2007      | 500         | 386 (77.20)  | 110 (22.00) | 4 (0.80)   | 500            | 415 (83.00)  | 83 (16.60)  | 2 (0.40)   |
| Pereira, 2008  | 114         | 14 (12.28)   | 97 (85.09)  | 3 (2.63)   | 114            | 81 (71.05)   | 33 (28.95)  | 0 (0.00)   |
| (P)Pande,2008  | 120         | 99 (82.50)   | 21 (17.50)  | 0 (0.00)   | 137            | 123 (89.78)  | 11 (8.03)   | 3 (2.19)   |
| Zheng,2009     | 79          | 23 (29.11)   | 31 (39.24)  | 25 (31.65) | 110            | 58 (52.73)   | 37 (33.64)  | 15 (13.64) |
| Kobayashi,2009 | 105         | 65 (61.90)   | 32 (30.48)  | 8 (7.62)   | 289            | 125 (43.25)  | 151 (52.25) | 13(4.50)   |
| Nisa,2010      | 685         | 418 (61.02)  | 231 (33.72) | 36 (5.26)  | 78             | 461 (59.25)  | 276 (35.48) | 41 (5.27)  |
| Cleary,2010    | 1160        | 1052 (90.69) | 98 (8.45)   | 10 (0.86)  | 1288           | 1166 (90.53) | 114 (8.85)  | 8 (0.62)   |
| Houille,2011   | 329         | 313 (95.14)  | 16 (4.86)   | 0 (0.00)   | 419            | 395 (94.27)  | 24 (5.73)   | 0 (0.00)   |
| Gil,2014       | 476         | 414 (86.97)  | 59 (12.39)  | 3 (0.63)   | 400            | 369 (92.25)  | 29 (7.25)   | 2 (0.50)   |

**Supplementary Table 3.2: The genotype distribution of rs4646903 T > C polymorphism of included studies**

| Study          | case        |              |             | Control    |                |              |             |             |
|----------------|-------------|--------------|-------------|------------|----------------|--------------|-------------|-------------|
|                | Case sample | TT (n/%)     | CT (n/%)    | CC (n/%)   | Control sample | TT (n/%)     | CT (n/%)    | CC (n/%)    |
| Sivaraman,1994 | 43          | 23 (53.49)   | 10 (23.26)  | 10 (23.26) | 47             | 33 (70.21)   | 14 (29.79)  | 0 (0.00)    |
| Frische,1999   | 187         | 151 (80.75)  | 35 (18.72)  | 1 (0.53)   | 101            | 90 (89.11)   | 11 (10.89)  | 0 (0.00)    |
| Ishibe,2000    | 211         | 170 (80.57)  | 37 (17.54)  | 4 (1.90)   | 221            | 169 (76.47)  | 47 (21.27)  | 5 (2.26)    |
| Ye,2002        | 41          | 35 (85.37)   | 6 (14.63)   | 0 (0.00)   | 82             | 73 (89.02)   | 9 (10.98)   | 0 (0.00)    |
| Sachse,2002    | 490         | 389 (79.39)  | 90 (18.37)  | 11 (2.24)  | 592            | 476 (80.41)  | 111 (18.75) | 5 (0.84)    |
| Slattery,2004  | 1805        | 1380 (76.45) | 387 (21.44) | 38 (2.11)  | 2164           | 1639 (75.74) | 479 (22.13) | 46 (2.13)   |
| Landi,2005     | 358         | 289 (80.73)  | 66 (18.44)  | 3 (0.84)   | 305            | 235 (77.05)  | 66 (21.64)  | 4 (1.31)    |
| Chen,2005      | 139         | 65 (46.76)   | 60 (43.17)  | 14 (10.07) | 340            | 122 (35.88)  | 165 (48.53) | 53 (15.59)  |
| Bente,2006     | 118         | 94 (79.66)   | 20 (16.95)  | 4 (3.39)   | 100            | 91 (91.00)   | 9 (9.00)    | 0 (0.00)    |
| Little,2006    | 232         | 190 (81.90)  | 38 (16.38)  | 4 (1.72)   | 378            | 310 (82.01)  | 66 (17.46)  | 2 (0.53)    |
| Youshida,2007  | 66          | 20 (30.30)   | 36 (54.55)  | 10 (15.15) | 121            | 49 (40.50)   | 54 (44.63)  | 18 (14.88)  |
| Pande,2008     | 120         | 83 (69.17)   | 37 (30.83)  | 0 (0.00)   | 137            | 104 (75.91)  | 29 (21.17)  | 4 (2.92)    |
| Liu,2009       | 75          | 38 (50.67)   | 19 (25.33)  | 18 (24.00) | 100            | 65 (62.00)   | 21 (21.00)  | 14 (14.00)  |
| Zheng,2009     | 79          | 35 (44.30)   | 33 (41.77)  | 11 (13.92) | 110            | 57 (51.82)   | 41 (37.27)  | 12 (10.91)  |
| Nisa,2010      | 685         | 283 (41.31)  | 307 (44.28) | 95 (13.87) | 778            | 305 (39.20)  | 368 (47.30) | 105 (13.50) |
| Cleary,2010    | 1163        | 904 (77.73)  | 247 (21.24) | 12 (1.03)  | 1290           | 1004 (77.83) | 260 (20.16) | 26 (2.02)   |
| Darazy,2011    | 46          | 42 (91.30)   | 2 (4.35)    | 2 (4.35)   | 56             | 54 (96.43)   | 1 (1.79)    | 1 (1.79)    |
| Houille,2011   | 329         | 265 (80.55)  | 61 (18.54)  | 3 (0.91)   | 419            | 333 (79.47)  | 79 (18.85)  | 7 (1.67)    |
| Saeed,2013     | 94          | 70 (74.47)   | 21 (22.34)  | 3 (3.19)   | 79             | 73 (92.41)   | 6 (7.59)    | 0 (0.00)    |
